# Supplementary material for: Stemformatics data portal enables transcriptional benchmarking of lab-derived myeloid cells
Source: PubMed Central journal article supplement — Stem Cell Reports. 2024 May 23;19(6):922–32. doi: 10.1016/j.stemcr.2024.04.012 (PMC11391030; doi:10.1016/j.stemcr.2024.04.012), 2024-05-23
Supplement: mmc1.pdf [file mmc1.pdf]

**Stem Cell Reports, Volume 19**

**Supplemental Information**

**Stemformatics data portal enables transcriptional benchmarking  
of lab-derived myeloid cells**

**Jarny Choi, Suzanne K. Butcher, Paul W. Angel, Jack Bransfield, Jake Barry, Noel Faux, Bobbie Shaban, Priyanka Pillai, Aleks Michalewicz, and Christine A. Wells**

## Supplementary data: Choi et al Finding and benchmarking stem cell-derived myeloid cells using the Stemformatics platform

**Fig S1.** Gene to samples function finds cell types where a user specified gene is expressed highly in all datasets in Stemformatics. The result is displayed hierarchically, where multiple datasets showing high expression in the same cell type are shown together. This increases the confidence that the result is generalisable across multiple settings.

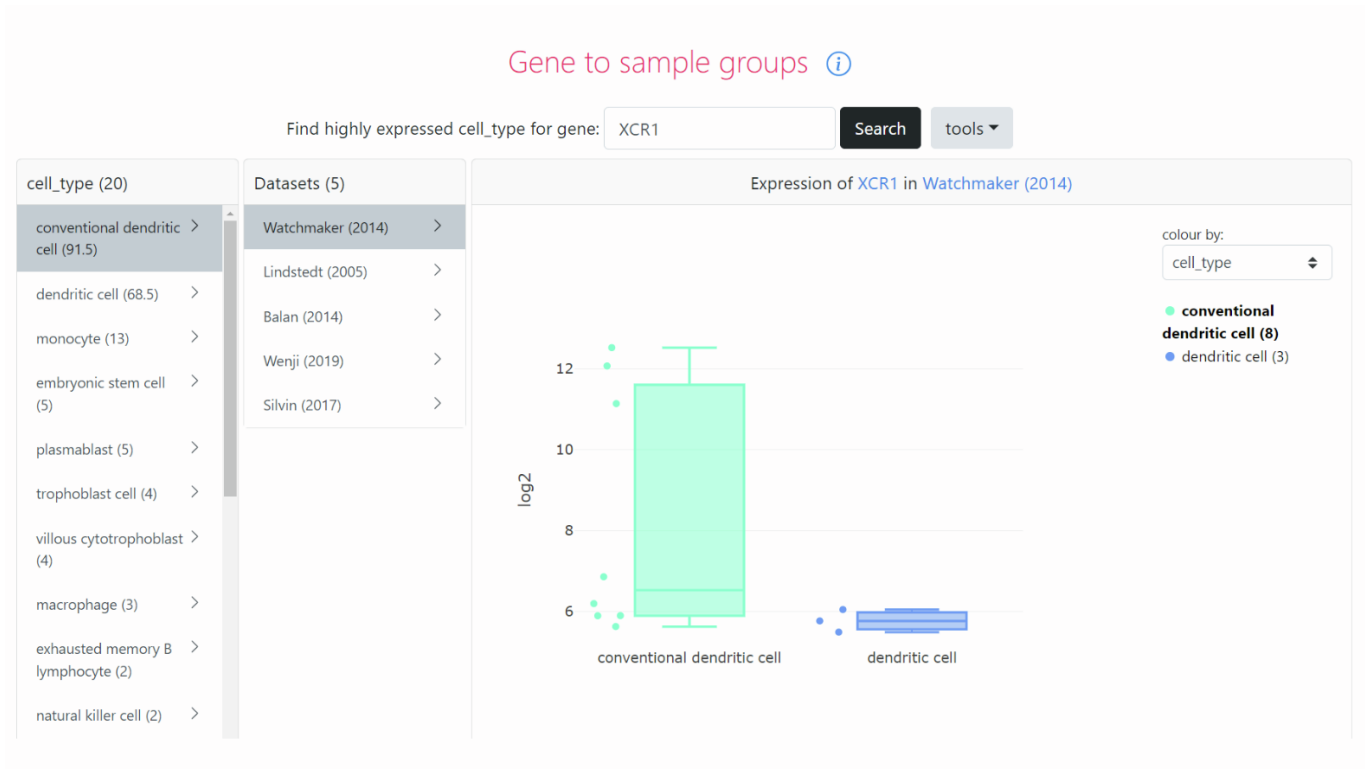

Supplementary data: Choi et al Finding and benchmarking stem cell-derived myeloid cells using the Stemformatics platform

**Table S1:** Example changes in sample annotation from the previous version where uniform nomenclature has been applied. Where the terminology contained cell of origin for differentiated cell, such as “hESC-derived neuron”, we've added this to the “parental\_cell\_type” field.

| Term before update                   | After update                                                                                                     |
|--------------------------------------|------------------------------------------------------------------------------------------------------------------|
| CD4 T cell                           | CD4-positive T lymphocyte                                                                                        |
| B cell                               | B-lymphocyte                                                                                                     |
| Blood dendritic cells                | dendritic cell                                                                                                   |
| human embryonic stem cell            | embryonic stem cell                                                                                              |
| Embryonic stem cell                  | embryonic stem cell                                                                                              |
| hESC-derived neuron                  | neuron (+ parental_cell_type = embryonic stem cell)                                                              |
| primary human neural progenitor      | neural progenitor cell                                                                                           |
| BMDM                                 | macrophage (+ tissue_of_origin = bone marrow)                                                                    |
| primary skin fibroblast              | fibroblast (+ tissue_of_origin = skin)                                                                           |
| hematopoietic multipotent progenitor | made more specific or changed to hematopoietic precursor cell (or, if FACS sorted, CD34-positive precursor cell) |
